# Supplementary material for: The Extents of Coronary Heart Disease and the Severity of Newly Developed Dry Eye Disease: A Nationwide Cohort Study
Source: MDPI journal article supplement (doi:10.3390/diagnostics14060586), 2024-03-10
Supplement: s1 [file s1]

**Table S1.** The association between dry eye disease development and potential risk factor.

| Factors                      | aHR   | 95% CI      | P value |
|------------------------------|-------|-------------|---------|
| Age (Reference:<60)          |       |             |         |
| 60-79                        | 1.489 | 1.094-1.861 | 0.0120* |
| >=80                         | 1.115 | 0.748-1.379 | 0.1145  |
| Sex (Reference: Female)      |       |             |         |
| Male                         | 0.548 | 0.347-1.160 | 0.6526  |
| Co-morbidities               |       |             |         |
| DM                           | 1.216 | 1.099-1.426 | 0.0284* |
| Rheumatic arthritis          | 1.432 | 0.875-1.692 | 0.2263  |
| Systemic lupus erythematosus | 0.883 | 0.524-1.097 | 0.3718  |
| Sjogren syndrome             | 1.664 | 1.185-2.372 | 0.0005* |
| Cataract surgery             | 1.280 | 0.818-1.492 | 0.4067  |
| Co-medication                |       |             |         |
| Anti-histamine               | 1.217 | 1.051-1.568 | 0.0314* |
| Beta-blocker                 | 1.192 | 0.716-1.777 | 0.5925  |
| Diuretic                     | 1.504 | 0.365-1.938 | 0.5004  |
| Benzodiazepine               | 1.619 | 1.004-2.721 | 0.0401* |

aHR: adjusted hazard ratio, CI: confidence interval, DM: diabetes mellitus. \* denotes significant correlation to dry eye disease development
